# Supplementary material for: Morning Spot Urine Glucose-to-Creatinine Ratios Predict Overnight Urinary Glucose Excretion in Patients With Type 2 Diabetes
Source: PubMed Central journal article supplement — Ann Lab Med. 2016 Nov 1;37(1):9–17. doi: 10.3343/alm.2017.37.1.9 (PMC5107628; doi:10.3343/alm.2017.37.1.9), 2016-11-01
Supplement: alm-37-9-s001.pdf [file alm-37-9-s001.pdf]

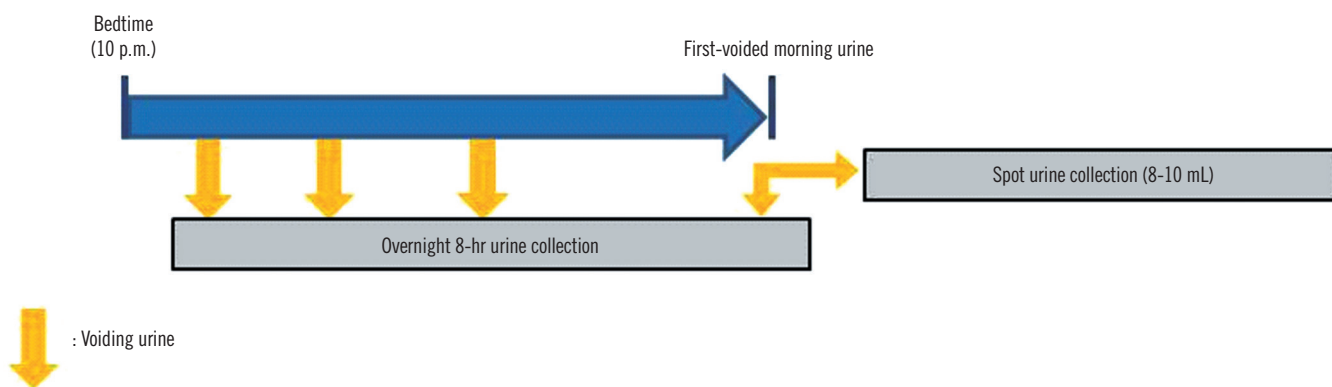

**Supplemental Data Figure S1.** Collection method for the overnight 8-hr and first-voided morning spot urine.
